# Supplementary material for: Vertebrate OTOP1 is also an alkali-activated channel
Source: Springer Nature journal article supplement (doi:10.1038/s41467-022-35754-9), 2023-01-03
Supplement: MOESM1 [file 41467_2022_35754_MOESM1_ESM.pdf]

# Vertebrate OTOP1 is also an alkali-activated channel

## Supplementary information

Lifeng Tian<sup>1,2,3,4,5,8</sup>, Hao Zhang<sup>1,2,3,8</sup>, Shilong Yang<sup>6,8</sup>, Anna Luo<sup>1,2,3</sup>, Peter Muiruri Kamau<sup>1,2,3,7</sup>, Jingmei Hu<sup>1,2,3</sup>, Lei Luo<sup>1,2\*</sup> & Ren Lai<sup>1,2,4,7\*</sup>

<sup>1</sup>Key Laboratory of Animal Models and Human Disease Mechanisms of the Chinese Academy of Sciences/Key Laboratory of Bioactive Peptides of Yunnan Province/National & Local Joint Engineering Center of Natural Bioactive Peptides, Kunming Institute of Zoology, Chinese Academy of Sciences, Kunming 650223, Yunnan, China

<sup>2</sup>National Resource Center for Non-Human Primates, Kunming Primate Research Center/National Research Facility for Phenotypic & Genetic Analysis of Model Animals (Primate Facility), Kunming Institute of Zoology, Chinese Academy of Sciences, Kunming 650107, Yunnan, China.

<sup>3</sup>University of Chinese Academy of Sciences, Beijing 100049, China.

<sup>4</sup>School of Molecular Medicine, Hangzhou Institute for Advanced Study, University of Chinese Academy of Sciences, Hangzhou, 310024, China

<sup>5</sup>The cancer Hospital of the University of Chinese Academy of Sciences, Institute of Basic Medicine and Cancer (IBMC), Chinese Academy of Sciences, Hangzhou 310022, China.

<sup>6</sup>College of Wildlife and Protected Area, Northeast Forestry University, Harbin 150040, China

<sup>7</sup>Sino-African Joint Research Center, Kunming Institute of Zoology, Chinese Academy of Sciences, Kunming, Yunnan 650223, China.

<sup>8</sup>These authors contributed equally: Lifeng Tian, Hao Zhang, Shilong Yang.

\*These authors jointly supervised this work: Lei Luo (luolei@mail.kiz.ac.cn) and Ren Lai (rlai@mail.kiz.ac.cn)

**This file includes:** Supplementary Figures 1-8.

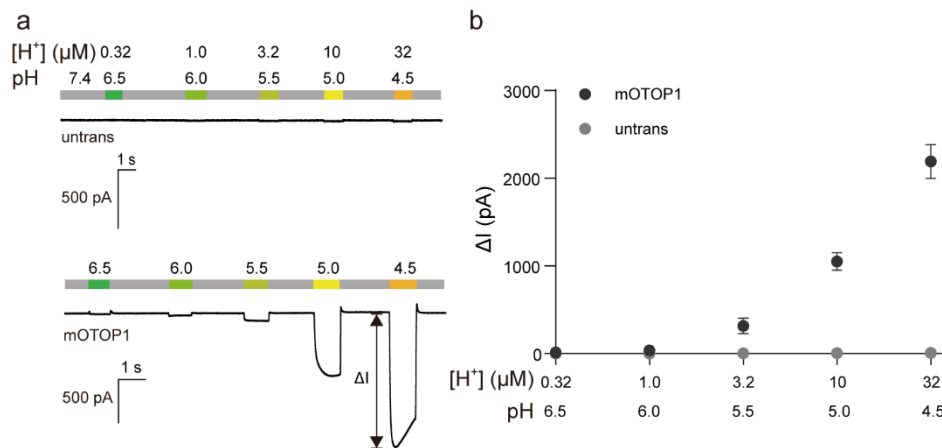

**Supplementary Fig. 1: Acid activation of mOTOP1 channel.** **a** Representative current traces evoked in HEK293T cells expressing mOTOP1 and untransfected HEK293T cells under different acidic pH OTOP1 extracellular solutions. **b** Plot of currents ( $\Delta I$ ; mean  $\pm$  SEM) versus pH (6.5–4.5) in HEK293T cells expressing mOTOP1 channels (black dots,  $n = 11$ ) and untransfected (gray dots,  $n = 10$ ), with membrane potential held at 0 mV, mean  $\pm$  SEM. Source data are provided as a Source Data file.

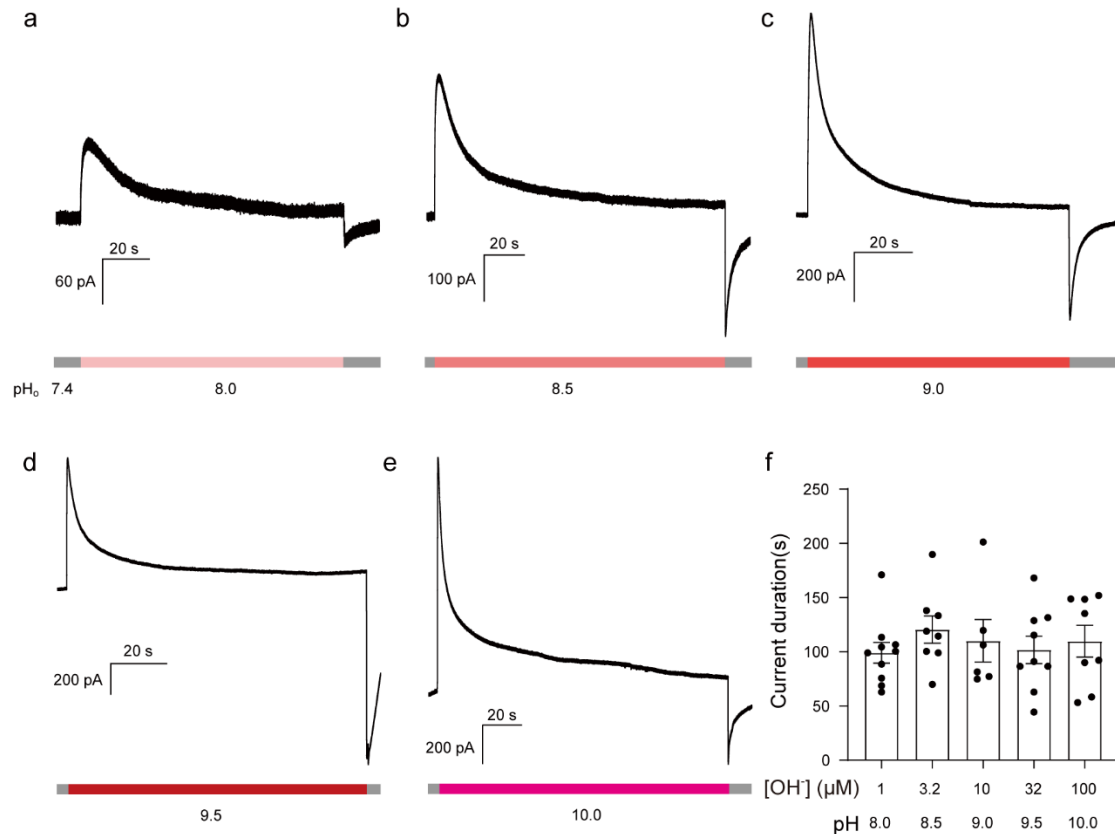

**Supplementary Fig. 2:** Current duration activated by alkali in HEK293T cells expressing mOTOP1 channels. **a-e** Representative alkali-induced currents with long-term alkali (pH 8.0-10.0) application at a holding potential of 0 mV. **f** Demonstration of the duration (from alkali-activated current generation to current holding constant) of outward current under long-term alkali (pH 8.0-10.0) application with different pH extracellular solutions (individual data point, mean  $\pm$  SEM). pH 8.0:  $99.055 \pm 9.629$  s,  $n = 10$ ; pH 8.5:  $120.468 \pm 12.486$  s,  $n = 8$ ; pH 9.0:  $110.077 \pm 19.623$  s,  $n = 6$ ; pH 9.5:  $101.671 \pm 12.685$  s,  $n = 9$ ; pH 10.0:  $109.737 \pm 14.635$  s,  $n = 8$ . One-way ANOVA, Dunnett's multiple comparisons test. There is no significant difference compared to pH 8.0. pH 8.5 vs. pH 8.0,  $p = 0.6961$ ; pH 9.0 vs. pH 8.0,  $p = 0.9789$ ; pH 9.5 vs. pH 8.0,  $p = 0.9998$ ; pH 10.0 vs. pH 8.0,  $p = 0.9735$ . Source data are provided as a Source Data file.

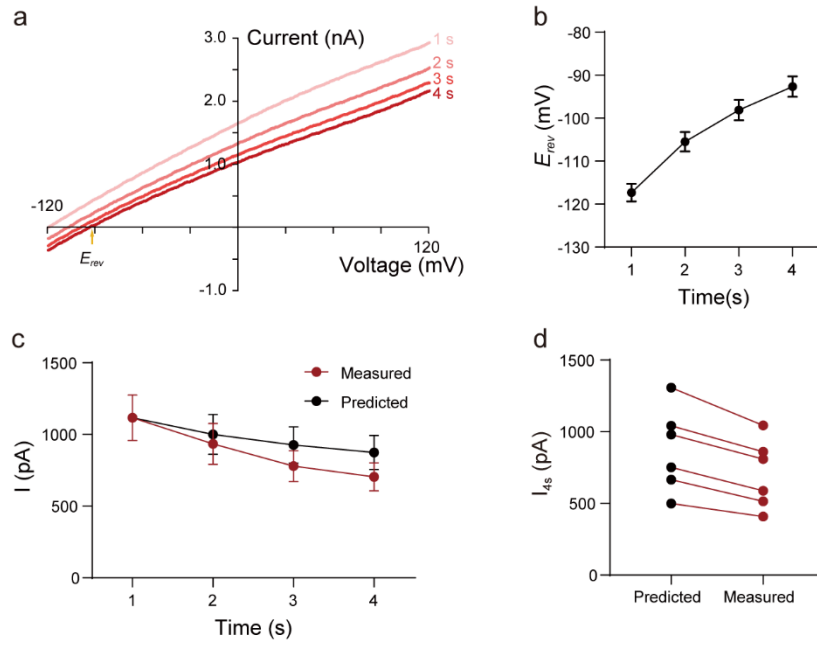

**Supplementary Fig. 3:** Changes in  $E_{rev}$  of mOTOP1 currents during long-term alkali application. **a** I-V curves of mOTOP1 channels were recorded at every one second interval in the alkaline extracellular solution.  $V_m$  was held at  $-120$  mV and ramped to  $+120$  mV,  $1$  V/s. **b** Change in  $E_{rev}$  as a function of time for OTOP1. Data are presented as mean  $\pm$  SEM. 1 s:  $-117.323 \pm 2.044$  mV,  $n = 6$ ; 2 s:  $-105.470 \pm 2.250$  mV,  $n = 6$ ; 3 s:  $-98.095 \pm 2.372$  mV,  $n = 6$ , 4 s:  $-92.628 \pm 2.402$  mV,  $n = 6$ . **c-d** Comparison of the measured magnitude of currents at  $V_m = 0$  mV predicted if the initial current decays due to a change in driving force for  $H^+$  efflux.  $I_{(x)} = I_{1s} * (V_m - E_{rev(x)}) / (V_m - E_{rev(1s)})$ , where  $x$  is a time point between 2 and 4 s after the onset of the stimulus. The measured current magnitudes were lower than the predicted calculated from the change in driving force.  $n = 6$ . Data are presented as mean  $\pm$  SEM in (c). Source data are provided as a Source Data file.

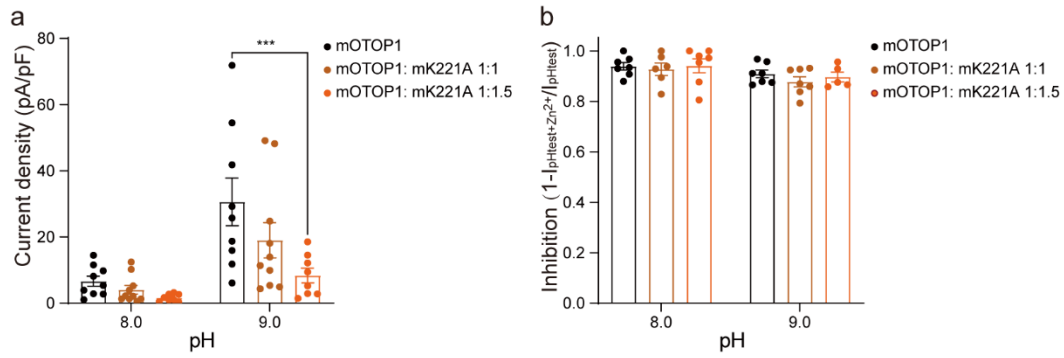

**Supplementary Fig. 4:** Alkali -induced current density of mOTOP1 channel correlates with its expression level. **a** Alkali -induced current density of mOTOP1 channel co-expressed with point mutants mK221A. Two-way ANOVA, Dunnett's multiple comparisons test, mean  $\pm$  SEM. pH 8.0: mOTOP1 (n = 9) vs. mOTOP1:mK221A 1:1 (n = 10),  $p = 0.8530$ , mOTOP1 vs. mOTOP1:mK221A 1:1.5 (n = 8),  $p = 0.5996$ ; pH 9.0: mOTOP1 (n = 9) vs. mOTOP1:mK221A 1:1 (n = 10),  $p = 0.0728$ , mOTOP1 vs. mOTOP1:mK221A 1:1.5 (n = 8),  $p = 0.0008$ . **b** Inhibition efficiency of 1 mM Zn<sup>2+</sup> on alkali-induced currents in mOTOP1 channels co-expressed with the point mutant mK221A. Two-way ANOVA, Dunnett's multiple comparisons test, mean  $\pm$  SEM. pH 8.0: n = 7 for mOTOP1 and mOTOP1:mK221A 1:1.5, n = 6 for mOTOP1:mK221A 1:1; pH 9.0: n = 7 for mOTOP1 and mOTOP1:mK221A 1:1, n = 5 for mOTOP1:mK221A 1:1.5. There is no significant difference. Source data are provided as a Source Data file.

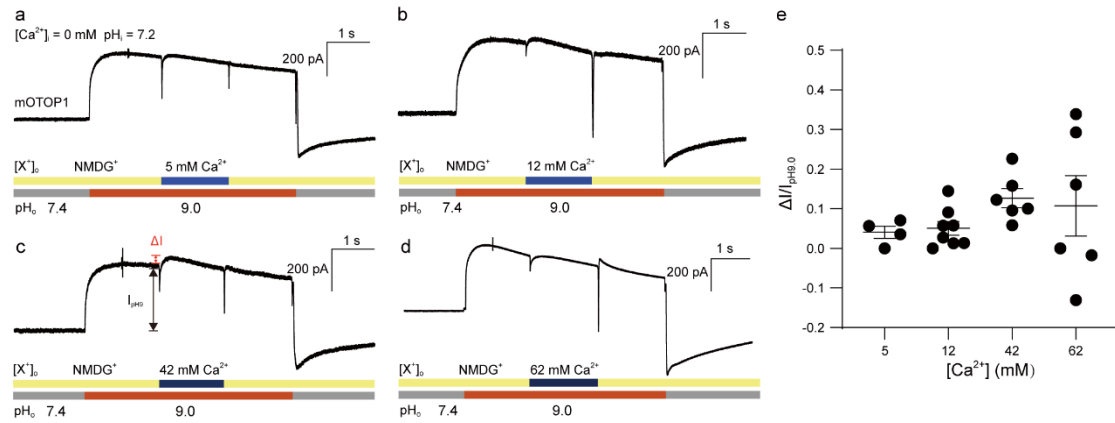

**Supplementary Fig. 5:** mOTOP1 channels are virtually impermeable to calcium ions when activated by alkali. **a-d** Calcium ions were chelated intracellularly with EGTA, NMDG<sup>+</sup> in the extracellular solution was replaced with gradient concentrations of Ca<sup>2+</sup> to measure the permeability of mOTOP1 channels to calcium ions. **e** HEK293T cells expressing mOTOP1 channels are barely permeable to calcium ions at different extracellular calcium ion concentrations. Data are presented as mean  $\pm$  SEM. A: 5 mM Ca<sup>2+</sup>, n = 4; B: 12mM Ca<sup>2+</sup>, n = 8; C: 42 mM Ca<sup>2+</sup>, n = 6; D: 62mM Ca<sup>2+</sup>, n = 6. One-way ANOVA, Dunnett's multiple comparisons test. 12 mM Ca<sup>2+</sup> vs. 5 mM Ca<sup>2+</sup>:  $p = 0.9965$ , 42 mM Ca<sup>2+</sup> vs. 5 mM Ca<sup>2+</sup>:  $p = 0.4110$ , 62 mM Ca<sup>2+</sup> vs. 5 mM Ca<sup>2+</sup>:  $p = 0.5940$ . Source data are provided as a Source Data file.

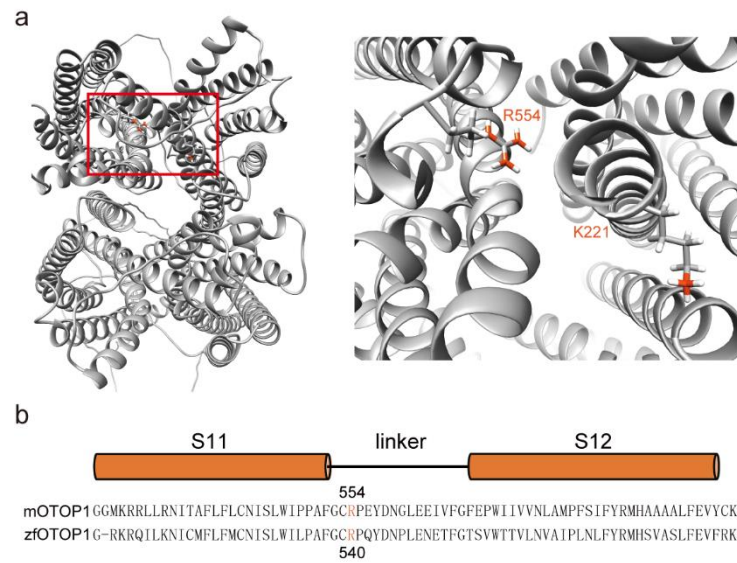

**Supplementary Fig. 6:** Key residues K221 and R554 in mOTOP1 are critical for alkali activation. **a** Top view of mOTOP1 structure (left), predicted by AlphaFold. Local view of K221 and R554, key residues of alkali-OTOP1 interactions (right). **b** Sequence alignment of mOTOP1 and zebrafish OTOP1 (zfOTOP1). Key residue associated with alkali binding is shown in orange. Cylinders above sequence indicate S11 and S12 transmembrane domains in OTOP1 structure.

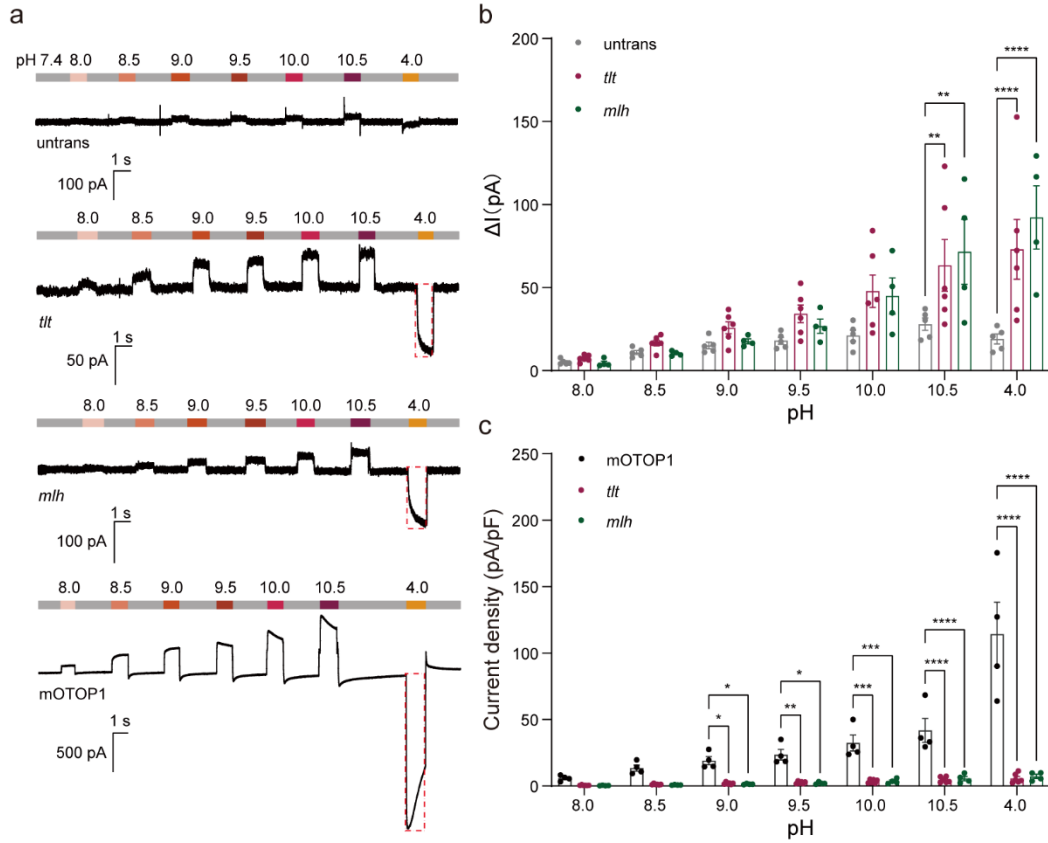

**Supplementary Fig. 7:** Alkali activation of naturally occurring mutations (tilted and mergulhador) of mOTOP1 channel. **a** Representative traces of currents evoked in HEK293T cells expressing mOTOP1, *tlt* (mA151E), *mlh* (mL408Q), and untransfected under different alkaline pH OTOP1 extracellular solutions. **b** Current amplitudes under different pH solutions in experiments of A, for *tlt* (n = 8), *mlh* (n = 4), and untrans (n = 5). Two-way ANOVA, Dunnett's multiple comparisons test, mean  $\pm$  SEM. **c** Current magnitudes recorded under variable alkali concentrations were normalized to Capacitance to control for different cells, for *tlt* (n = 8), *mlh* (n = 4), and mOTOP1 (n = 4). Two-way ANOVA, Dunnett's multiple comparisons test, mean  $\pm$  SEM. \*  $p < 0.05$ , \*\*  $p < 0.01$ , \*\*\*  $p < 0.001$ , \*\*\*\*  $p < 0.0001$ . Exact  $p$ -values: **b**: \*\* $p = 0.0077$ , \*\* $p = 0.0029$ ; **c**: \* $p = 0.0298$ , \* $p = 0.0418$ , \*\* $p = 0.0067$ , \* $p = 0.0117$ , \*\*\* $p = 0.0002$ , \*\*\* $p = 0.0006$ . Source data are provided as a Source Data file.



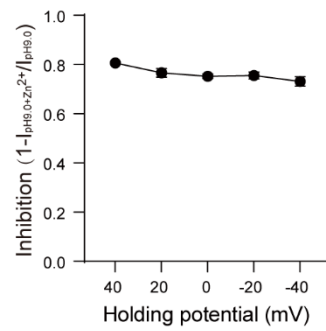

**Supplementary Fig. 8:** Inhibition efficiency of  $\text{Zn}^{2+}$  at different voltages. The inhibition efficiency of  $\text{Zn}^{2+}$  on mOTOP1 was not dramatically changed upon different stimulating voltages. One-way ANOVA, Dunnett's multiple comparisons test,  $n = 3$  for 40 mV, 20 mV, and -40 mV,  $n = 4$  for 0 mV and -20 mV. There is no significant difference compared to the inhibition rate at 0 mV. Source data are provided as a Source Data file.
